# Supplementary material for: Quercetin prevents chronic kidney disease on mesangial cells model by regulating inflammation, oxidative stress, and TGF-β1/SMADs pathway
Source: PeerJ. 2022 Jun 2;10:e13257. doi: 10.7717/peerj.13257 (PMC9167587; doi:10.7717/peerj.13257)
Supplement: Supplemental Information 1 [file peerj-10-13257-s001.xlsx]

## Sheet: TGFB1_Quer
TGF-β1
Sample	Absorbance			Corrected Absorbance			Average	Concentration of TGF-β1 (pg/ml)			Average	std	rsd
	1	2	3	1	2	3		1	2	3
Positive Control	0.4427	0.4633	0.5018	0.38605	0.40665	0.44515	0.412617	164.539	180.482	212.27	185.763	24.3	13.0811
Negative Control	0.2501	0.2726	0.2946	0.19345	0.21595	0.23795	0.215783	51.4314	61.2941	71.7947	61.5067	10.1833	16.5564
Quercetin 50 µg/mL	0.4116	0.427	0.4333	0.35495	0.37035	0.37665	0.367317	141.877	152.887	157.511	150.758	8.03112	5.32715
Quercetin 10 µg/mL	0.3521	0.3712	0.362	0.29545	0.31455	0.30535	0.305117	103.242	114.968	109.24	109.15	5.86392	5.37234
Quercetin 5 µg/mL	0.3331	0.3044	0.2917	0.27645	0.24775	0.23505	0.253083	92.21	76.745	70.362	79.7723	11.2342	14.0828

## Sheet: TNFa_Quer
TNF-α
Sample	Absorbance			Corrected Absorbance			Average	Concentration of TNF-a (pg/ml)			Average	std	rsd
	1	2	3	1	2	3		1	2	3
Positive Control	0.5882	0.5789	0.5951	0.52775	0.51845	0.53465	0.52695	302.548	297.02	306.666	302.078	4.84037	1.60236
Negative Control	0.2829	0.2957	0.2852	0.22245	0.23525	0.22475	0.227483	134.512	141	135.674	137.062	3.45955	2.52408
Quercetin 50 µg/mL	0.5303	0.5336	0.5317	0.46985	0.47315	0.47125	0.471417	268.549	270.46	269.359	269.456	0.959151	0.355958
Quercetin 10 µg/mL	0.398	0.3949	0.3907	0.33755	0.33445	0.33025	0.334083	194.605	192.935	190.677	192.739	1.97153	1.0229
Quercetin 5 µg/mL	0.2997	0.2992	0.369	0.23925	0.23875	0.30855	0.262183	143.037	142.782	179.093	154.971	20.8908	13.4805

## Sheet: MDA_Quer
MDA
Sample	Absorbance			Corrected Absorbance			Average	Concentration of MDA (ng/ml)			Average	std	rsd
	1	2	3	1	2	3		1	2	3
Positive Control	0.2957	0.291	0.2917	-1.91505	-1.91975	-1.91905	-1.91795	825.406	828.344	827.906	827.219	1.58484	0.191587
Negative Control	0.8284	0.8682	0.7225	-1.38235	-1.34255	-1.48825	-1.40438	492.469	467.594	558.656	506.24	47.0672	9.29742
Quercetin 50 µg/mL	0.3688	0.3679	0.4705	-1.84195	-1.84285	-1.74025	-1.80835	779.719	780.281	716.156	758.719	36.8613	4.85836
Quercetin 10 µg/mL	0.4776	0.5791	0.4767	-1.73315	-1.63165	-1.73405	-1.69962	711.719	648.281	712.281	690.76	36.7891	5.32589
Quercetin 5 µg/mL	0.6835	0.6952	0.6878	-1.52725	-1.51555	-1.52295	-1.52192	583.031	575.719	580.344	579.698	3.69878	0.638053

## Sheet: SMAD2
SMAD2
Sampel	Cq SMAD2			Average	Cq GAPDH			Average	∆Cq			Average	∆∆Cq			Ekspresi Gen SMAD2			Average	SD	RSD
	1	2	3		1	2	3		1	2	3		1	2	3	1	2	3
Positive Control	33.12	33.07	33.14	33.11	33.97	34.12	34.29	34.1267	-0.85	-1.05	-1.15	-1.01667	0.166667	-0.0333333	-0.133333	0.890899	1.02337	1.09682	1.0037	0.104363	10.3979
Negative Control	29.85	29.57	29.8	29.74	35.36	35.58	35.67	35.5367	-5.51	-6.01	-5.87		-4.49333	-4.99333	-4.85333	22.5231	31.8525	28.9067	27.7608	4.76909	17.1792
Quercetin 50 µg/mL	25.39	25.82	25.33	25.5133	29.91	30.59	30.19	30.23	-4.52	-4.77	-4.86		-3.50333	-3.75333	-3.84333	11.3399	13.4855	14.3535	13.0596	1.5513	11.8786
Quercetin 10 µg/mL	26.78	26.01	26.41	26.4	30.87	30.08	30.19	30.38	-4.09	-4.07	-3.78		-3.07333	-3.05333	-2.76333	8.41716	8.30128	6.78963	7.83602	0.908051	11.5882
Quercetin 5 µg/mL	12.62	11.57	11.38	11.8567	15.83	15.03	15.04	15.3	-3.21	-3.46	-3.66		-2.19333	-2.44333	-2.64333	4.57361	5.43897	6.24774	5.4201	0.837222	15.4466

## Sheet: SMAD3
SMAD3
Sampel	Cq SMAD3			Average	Cq GAPDH			Average	∆Cq			Average	∆∆Cq			Ekspresi Gen SMAD3			Average	SD	RSD
	1	2	3		1	2	3		1	2	3		1	2	3	1	2	3
Positive Control	21.26	21.27	21.56	21.36	13.46	13.53	13.38	13.46	7.8	7.74	8.18	7.91	-0.11	-0.17	0.27	1.08	1.12	0.83	1.01	0.16	15.74
Negative Control	26.07	26.16	25.94	26.06	23.82	23.73	23.39	23.65	2.25	2.43	2.55		-5.66	-5.48	-5.36	50.45	44.53	40.97	45.32	4.78	10.56
Quercetin 50 µg/mL	32.08	31.65	31.56	31.76	28.61	28.23	28.28	28.37	3.47	3.42	3.28		-4.44	-4.49	-4.63	21.66	22.42	24.7	22.93	1.59	6.92
Quercetin 10 µg/mL	24.97	25.27	25.09	25.11	21.18	21.14	21.26	21.19	3.79	4.13	3.83		-4.12	-3.78	-4.08	17.35	13.71	16.87	15.98	1.98	12.4
Quercetin 5 µg/mL	19.11	19.83	19.43	19.46	14.41	14.8	14.36	14.52	4.7	5.03	5.07		-3.21	-2.88	-2.84	9.23	7.34	7.14	7.91	1.15	14.57

## Sheet: SMAD4
SMAD4
Sampel	Cq SMAD3			Average	Cq GAPDH			Average	∆Cq			Average	∆∆Cq			Ekspresi Gen SMAD3			Average	SD	RSD
	1	2	3		1	2	3		1	2	3		1	2	3	1	2	3
Positive Control	23.55	22.95	21.61	22.7	25.62	25.13	23.6	24.78	-2.07	-2.18	-1.99	-2.08	0.01	-0.1	0.09	0.99	1.07	0.94	1	0.07	6.64
Negative Control	10.15	10.19	10.54	10.29	13.38	13.36	13.85	13.53	-3.23	-3.17	-3.31		-1.15	-1.09	-1.23	2.22	2.13	2.35	2.23	0.11	4.88
Quercetin 50 µg/mL	27.12	25.14	24.93	25.73	29.91	28.29	27.79	28.66	-2.79	-3.15	-2.86		-0.71	-1.07	-0.78	1.64	2.1	1.72	1.82	0.25	13.62
Quercetin 10 µg/mL	19.88	19.72	19.55	19.72	22.83	22.63	22.08	22.51	-2.95	-2.91	-2.53		-0.87	-0.83	-0.45	1.83	1.78	1.37	1.66	0.25	15.29
Quercetin 5 µg/mL	22.09	13.65	12.31	16.02	24.02	16.11	14.71	18.28	-1.93	-2.46	-2.4		0.15	-0.38	-0.32	0.9	1.3	1.25	1.15	0.22	18.89

## Sheet: SMAD7
SMAD7
Sampel	Cq SMAD3			Average	Cq GAPDH			Average	∆Cq			Average	∆∆Cq			Ekspresi Gen SMAD3			Average	SD	RSD
	1	2	3		1	2	3		1	2	3		1	2	3	1	2	3
Positive Control	19.59	18.24	18.58	18.8	24.85	23.37	23.78	24	-5.26	-5.13	-5.2	-5.2	-0.06	0.07	0	1.04	0.95	1	1	0.05	4.5
Negative Control	8.45	8.88	9.75	9.03	12.71	13	13.91	13.31	-4.26	-4.12	-4.16		0.94	1.08	1.04	0.52	0.47	0.49	0.49	0.02	5.04
Quercetin 50 µg/mL	27.27	24.45	23.38	25.03	31.06	28.63	27.44	29.04	-3.79	-4.18	-4.06		1.41	1.02	1.14	0.38	0.49	0.45	0.44	0.06	13.47
Quercetin 10 µg/mL	19.79	16.35	15.72	17.29	24.62	21.11	20.21	21.98	-4.83	-4.76	-4.49		0.37	0.44	0.71	0.78	0.74	0.61	0.71	0.09	12.05
Quercetin 5 µg/mL	10.23	9.01	9.15	9.46	15.5	14.02	14.09	14.54	-5.27	-5.01	-4.94		-0.07	0.19	0.26	1.05	0.88	0.84	0.92	0.11	12.37
